# Supplementary material for: Dual electric and magnetic responsivity of multilayered magnetite-embedded core/shell silica/titania nanoparticles with outermost silica shell
Source: Royal Society of Chemistry journal article supplement (doi:10.1039/c8tc03677b), 2018-01-01
Supplement: c8tc03677b1.pdf [file c8tc03677b1.pdf]

# **Dual Electric and Magnetic Responsivity of Smart Fluids Containing Multilayered Magnetite-Embedded Core/Shell Silica/Titania Nanoparticles Having an Outermost Silica Shell**

*Chang-Min Yoon<sup>†</sup>, Yoonsun Jang<sup>†</sup>, Seungae Lee<sup>‡\*</sup> and Jyongsik Jang<sup>†\*</sup>*

<sup>†</sup> School of Chemical and Biological Engineering, Seoul National University, 599 Gwanak-ro,  
Gwanak-gu, Seoul 151-742, Korea

<sup>‡</sup> Department of Chemical Engineering, Konkuk University, 120 Neungdong-ro, Gwangjin-gu,  
Seoul 05029, Korea

**RECEIVED DATE (to be automatically inserted after your manuscript is accepted if  
required according to the journal that you are submitting your paper to)**

\* Tel.: 82-2-880-7069; Fax: 82-2-888-7295; e-mail: jsjang@plaza.snu.ac.kr

## FT-IR spectra of nanoparticles in the range of 1700 – 900 $\text{cm}^{-1}$

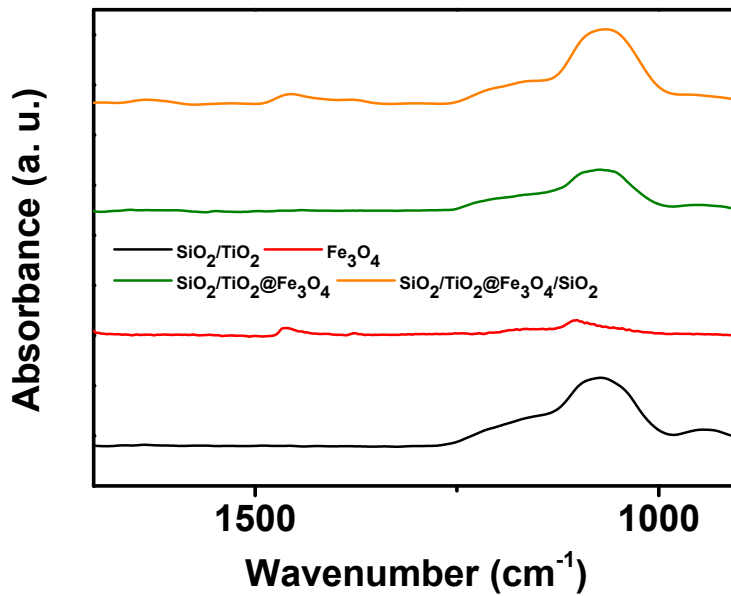

**Fig. S1** Fourier transform-infrared spectra of  $\text{SiO}_2/\text{TiO}_2$  core/shell,  $\text{Fe}_3\text{O}_4$ ,  $\text{SiO}_2/\text{TiO}_2@\text{Fe}_3\text{O}_4$  and  $\text{SiO}_2/\text{TiO}_2@\text{Fe}_3\text{O}_4/\text{SiO}_2$  nanoparticles in the ranges of 1,700 to 900  $\text{cm}^{-1}$ .

## Dielectric constant ( $\epsilon'$ ) curves of various nanoparticles

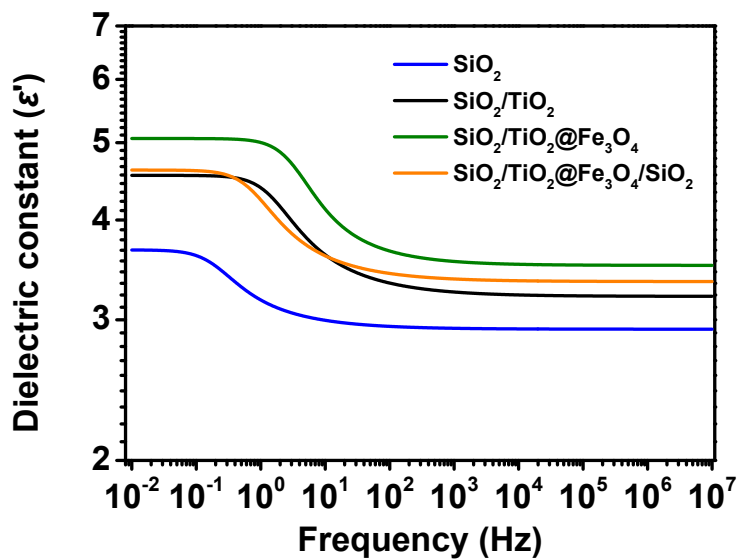

**Fig. S2** Dielectric constant ( $\epsilon'$ ) of various nanoparticles dispersed in silicone oil (20.0 vol%) as a function of electric field frequency ( $f$ ).

## Detailed dielectric properties of various nanoparticles

**Table S1** Dielectric parameters of nanoparticles dispersed in silicone oil (20.0 vol%)<sup>a</sup>

| Nanoparticles                                                                        | $\epsilon_0$ | $\epsilon_\infty$ | $\Delta\epsilon = (\epsilon_0 - \epsilon_\infty)$ |
|--------------------------------------------------------------------------------------|--------------|-------------------|---------------------------------------------------|
| SiO <sub>2</sub>                                                                     | 3.67         | 2.92              | 0.75                                              |
| SiO <sub>2</sub> /TiO <sub>2</sub>                                                   | 4.55         | 3.21              | 1.34                                              |
| SiO <sub>2</sub> /TiO <sub>2</sub> @Fe <sub>3</sub> O <sub>4</sub>                   | 5.06         | 3.51              | 1.55                                              |
| SiO <sub>2</sub> /TiO <sub>2</sub> @Fe <sub>3</sub> O <sub>4</sub> /SiO <sub>2</sub> | 4.62         | 3.35              | 1.27                                              |

<sup>a</sup> Dielectric properties were measured by the impedance analyzer (Solatron-1260) and dielectric interface (Solatron-1296).

## Dispersion stabilities of $\text{SiO}_2/\text{TiO}_2@\text{Fe}_3\text{O}_4/\text{SiO}_2$ nanoparticle

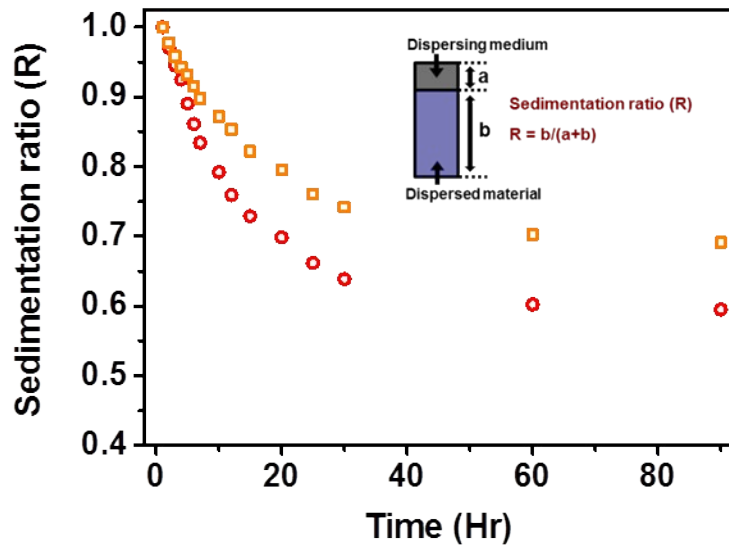

**Fig. S3** Dispersion stabilities of  $\text{Fe}_3\text{O}_4$  and  $\text{SiO}_2/\text{TiO}_2@\text{Fe}_3\text{O}_4/\text{SiO}_2$  nanoparticles dispersed in silicone oil with the concentrations of 20.0 vol% [inset: definition of the sedimentation ratio (R)].

## Practical OM observation of fibril-like structure formation under various conditions of external fields

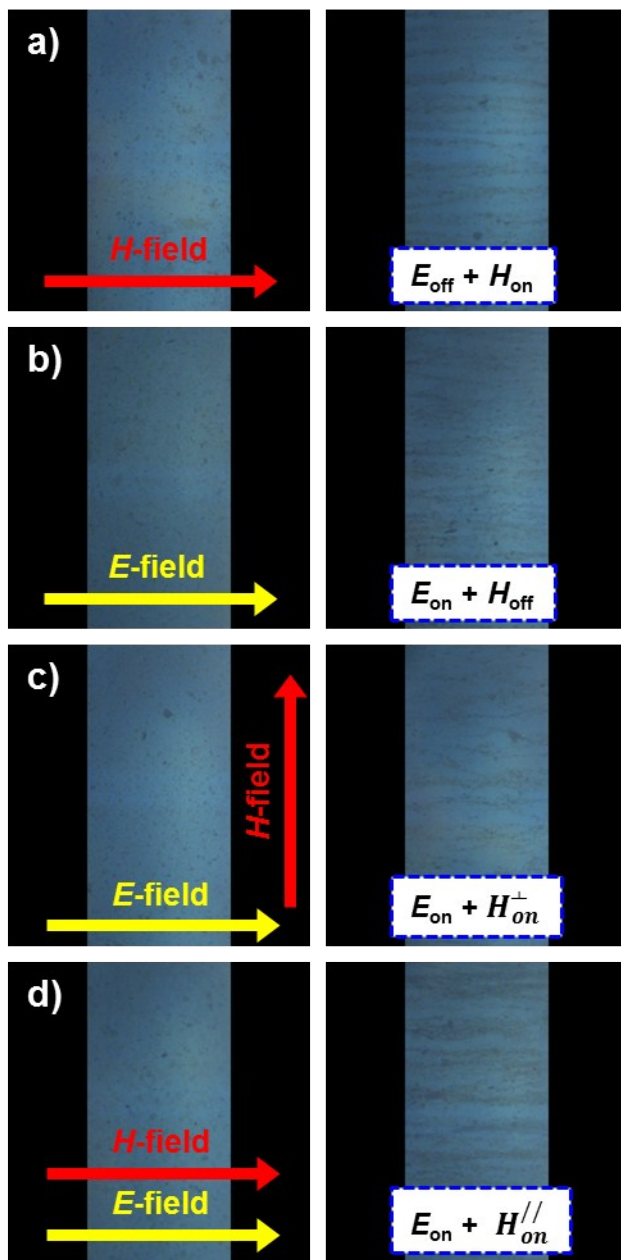

**Fig. S4** OM observation of the practical fibril-like structure formation of  $\text{SiO}_2/\text{TiO}_2@\text{Fe}_3\text{O}_4/\text{SiO}_2$  nanoparticles-based EMR fluids under various conditions: a) only  $H$  field (0.2 T), b) only  $E$  field ( $3.0 \text{ kV mm}^{-1}$ ), c)  $E + H$  fields in perpendicular direction, and d)  $E + H$  fields in parallel direction.
